# Supplementary material for: A review on recent advances in selective and sensitive detection of heavy toxic metal ions in water using g-C3N4-based heterostructured composites
Source: Royal Society of Chemistry journal article supplement (doi:10.1039/d2qm00431c), 2022-01-01
Supplement: d2qm00431c1.pdf [file d2qm00431c1.pdf]

**A review on recent advances in selective and sensitive detection of heavy toxic metal ions in water using g-C<sub>3</sub>N<sub>4</sub>-based heterostructured composites**

**Dasari Ayodhya\***

Department of Chemistry, University College of Science, Osmania University,  
Hyderabad-500007, Telangana State, India

Corresponding author information:

\*E-mail: ayodhyadasari@gmail.com; ayodyadasari@osmania.ac.in

Tel: +91 9010877323

# Supplementary information

## Figures

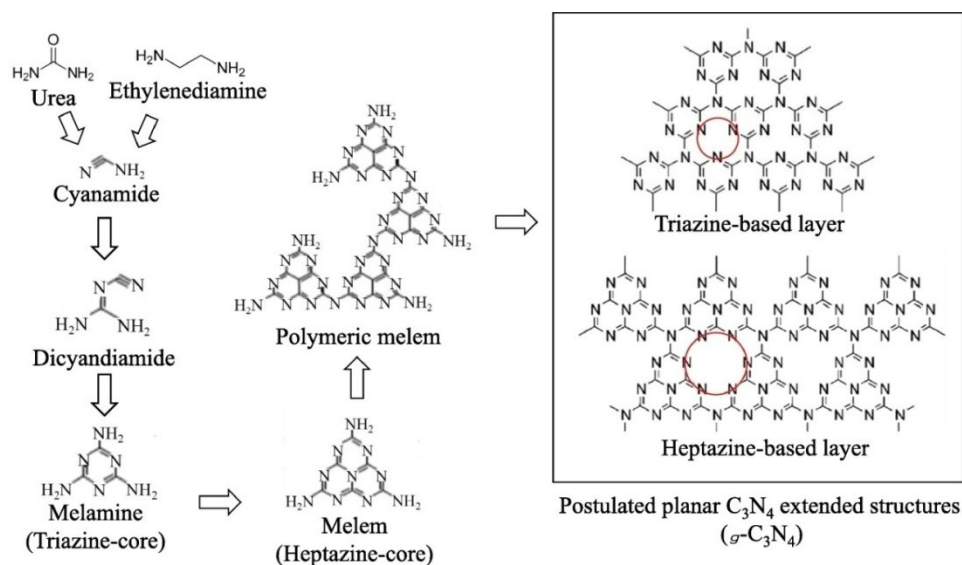

**Fig. S1** Structural evolution from urea and ethylenediamine to  $g\text{-C}_3\text{N}_4$ , Characteristic intrinsic vacancies surrounded by nitrogen atoms are emphasized by red circles.<sup>43</sup>

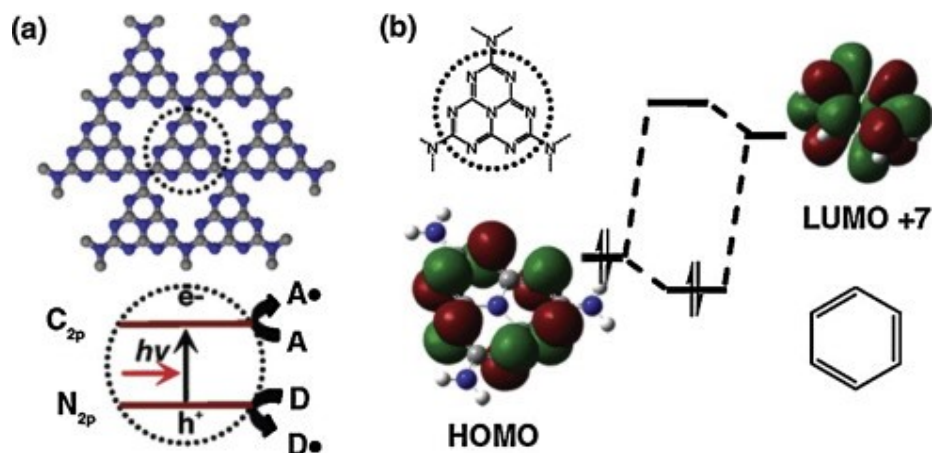

**Fig. S2** (a) Stacked  $g\text{-C}_3\text{N}_4$  sheets function as an all-organic solid-state photocatalyst promoting redox reactions with visible light; (b) chemical interaction of benzene and defective  $g\text{-C}_3\text{N}_4$  via HOMO–LUMO hybridization of melem and benzene.<sup>27</sup>

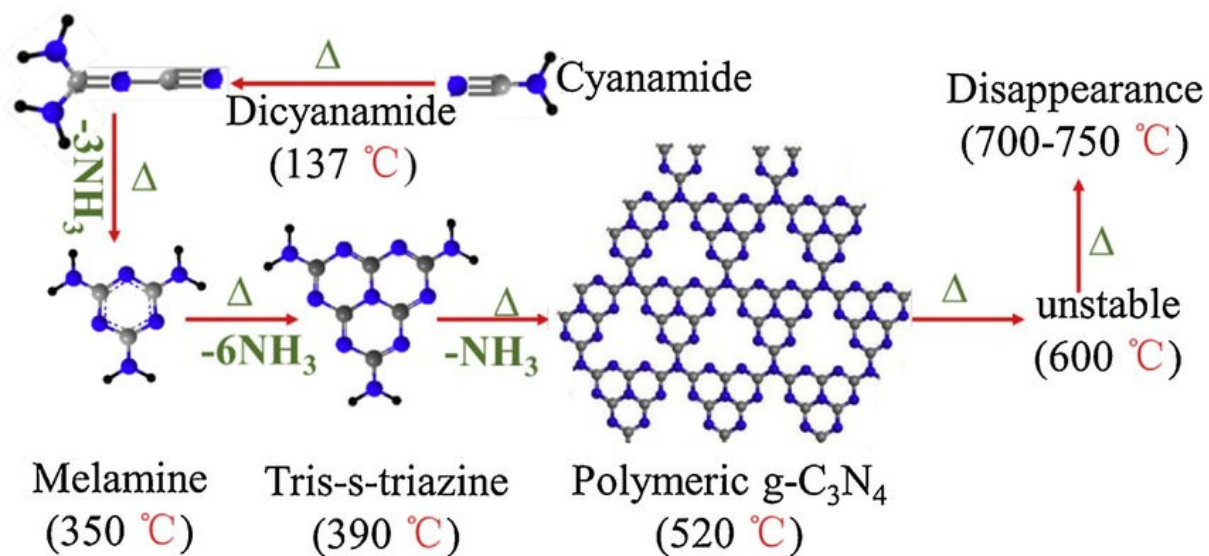

Fig. S3 Reaction path for the formation of g-C<sub>3</sub>N<sub>4</sub> starting from cyanamide.<sup>51</sup>

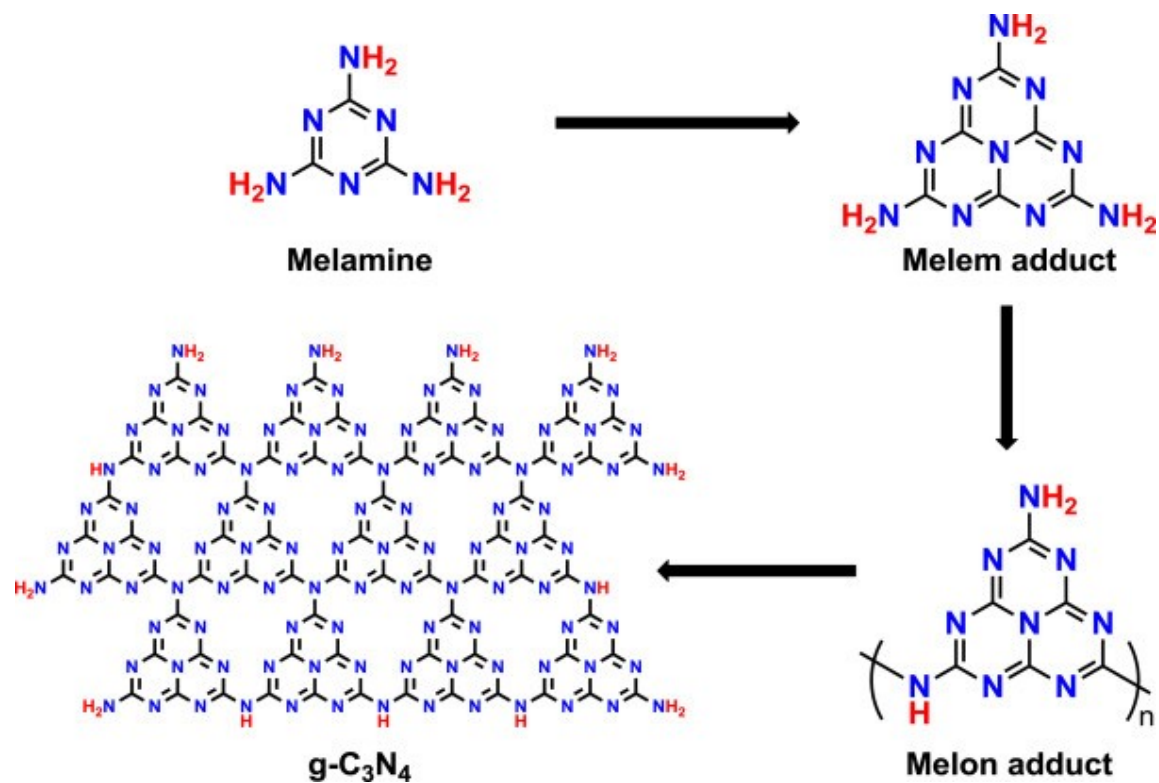

Fig. S4 Reaction pathway for the formation of g-C<sub>3</sub>N<sub>4</sub> by polycondensation of Melamine.<sup>64</sup>

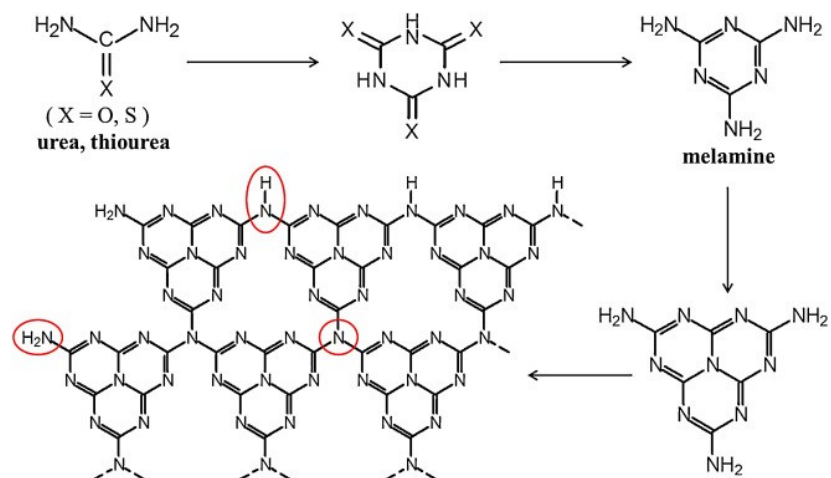

**Fig. S5** Reaction paths for the formation of g-C<sub>3</sub>N<sub>4</sub> from melamine, thiourea, and urea.<sup>65</sup>

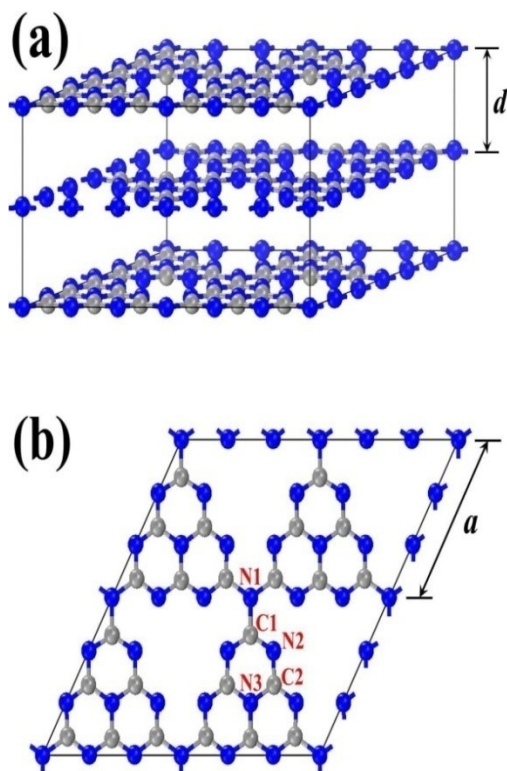

**Fig. S6** Geometric structures of (a) bulk g-C<sub>3</sub>N<sub>4</sub> and (b) single layer g-C<sub>3</sub>N<sub>4</sub>; the gray and blue balls are carbon and nitrogen atoms, respectively.<sup>67</sup>

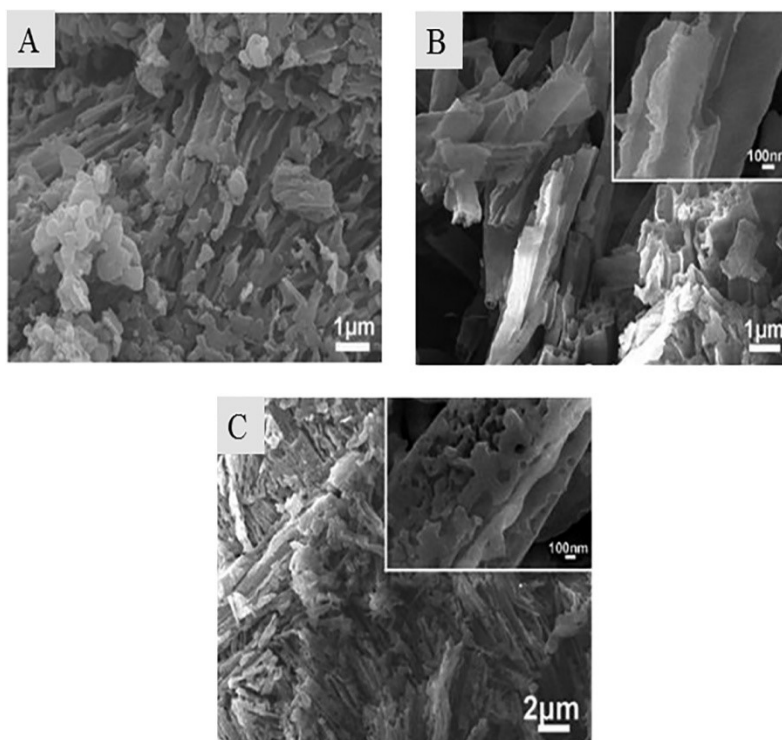

**Fig. S7** SEM images of  $g\text{-C}_3\text{N}_4$  with different morphology. (A) nanoflakes, (B) nanotubes, (C) rod-like structure.<sup>74</sup>

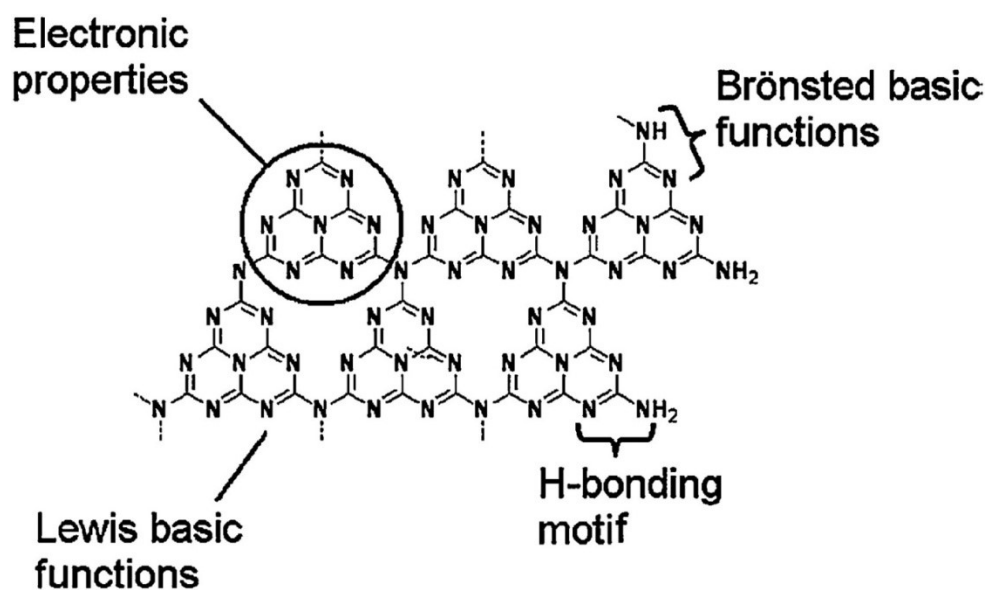

**Fig. S8** Multiple functional surface properties of polymeric  $g\text{-C}_3\text{N}_4$  material with defects.<sup>37</sup>

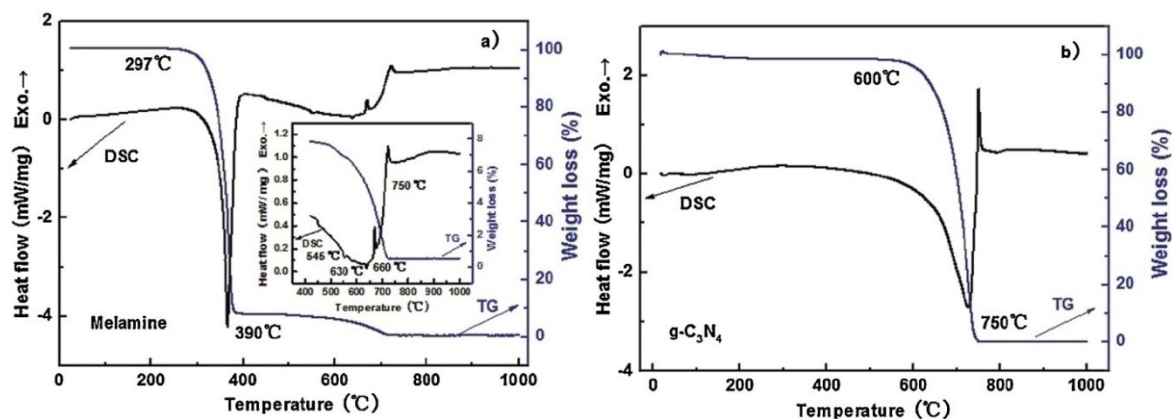

**Fig. S9** The TG-DSC analysis for heating the melamine (a) and the g-C<sub>3</sub>N<sub>4</sub> (b) obtained by heat polymerization of melamine at 520 °C.<sup>82</sup>

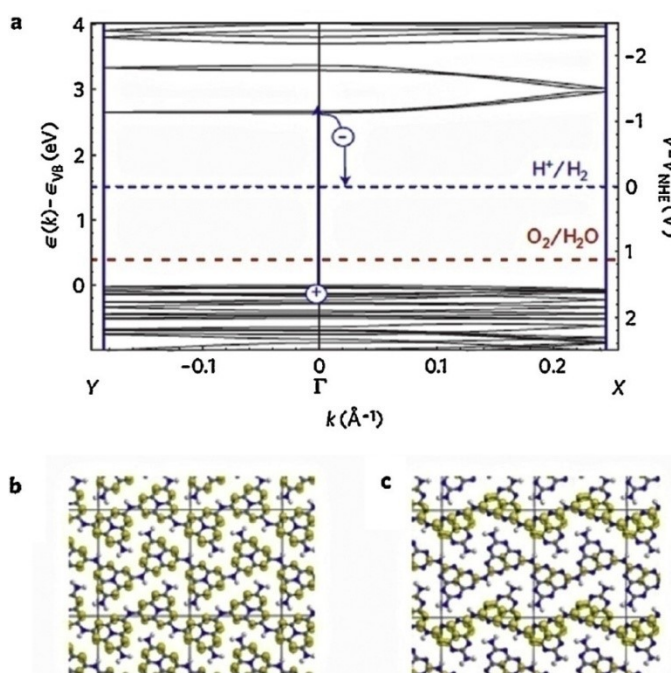

**Fig. S10** Electronic structure of g-C<sub>3</sub>N<sub>4</sub>, (a) DFT band structure for g-C<sub>3</sub>N<sub>4</sub> calculated along the  $\Gamma$ -X and Y- $\Gamma$  directions. The potentials for H<sup>+</sup> to H<sub>2</sub> and H<sub>2</sub>O to O<sub>2</sub> are displayed by the blue and red dashed lines, respectively; the Kohn-Sham orbitals for the valence band (b) and conduction band (c) of g-C<sub>3</sub>N<sub>4</sub>. The C, N and H atoms are gray, blue and white, respectively. The isodensity surfaces are drawn for a charge density of 0.01 qe<sup>0</sup>Å<sup>-3</sup>.<sup>22</sup>

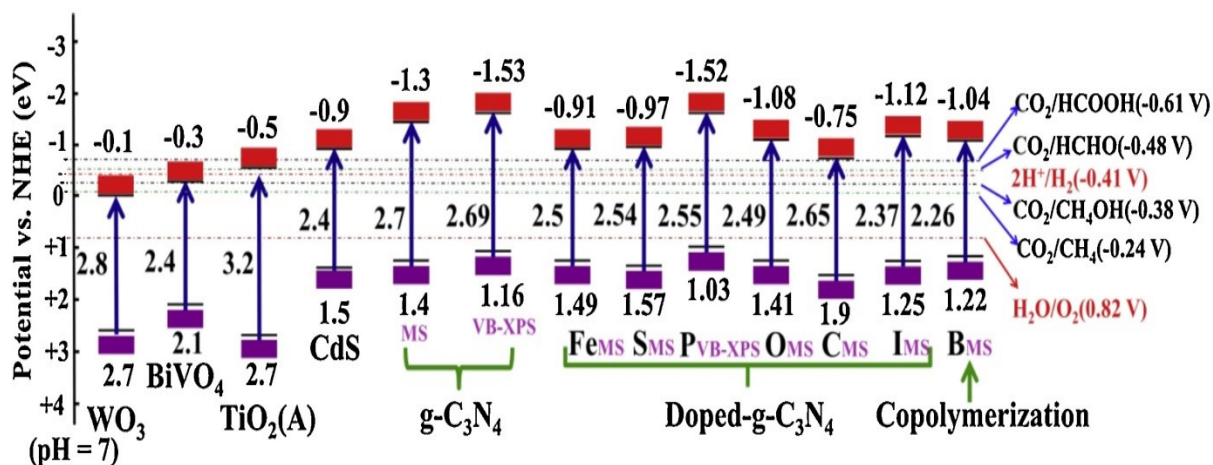

**Fig. S11** Schematic illustration of the band structures of different types of  $g\text{-C}_3\text{N}_4$  samples and other samples (VB-XPS: valence band X-ray photoelectron spectroscopy; MS: electrochemical analysis by Mott–Schottky plots).<sup>54</sup>

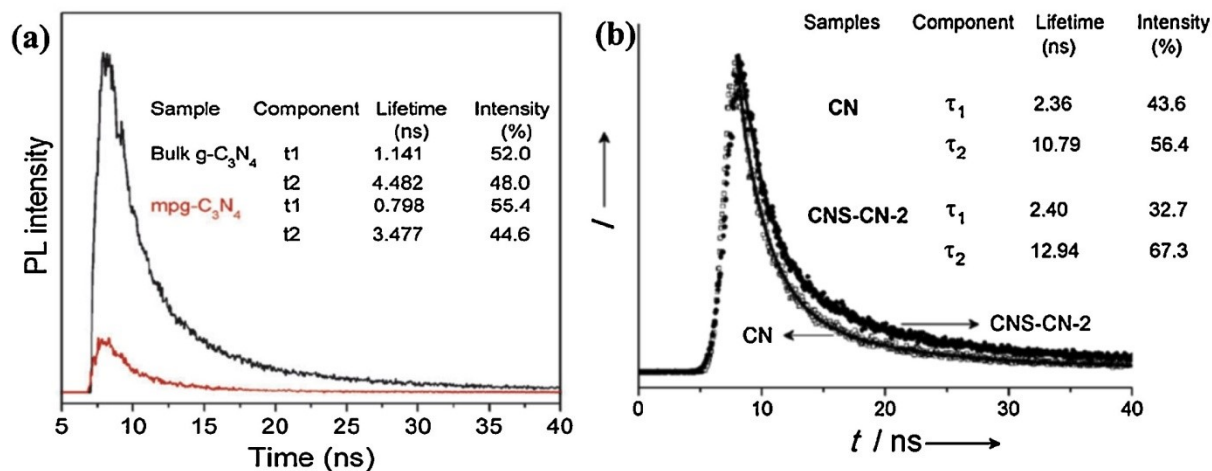

**Fig. S12** (a) time-resolved PL spectrum monitored at 525 nm under 420 nm excitation at 298 K for bulk  $g\text{-C}_3\text{N}_4$  (black) and  $mpg\text{-C}_3\text{N}_4$  (red);<sup>31</sup> (b) time-resolved PL spectra monitored at 480 nm under 420 nm excitation at 77 K for CN and CNS-CN.<sup>111</sup>

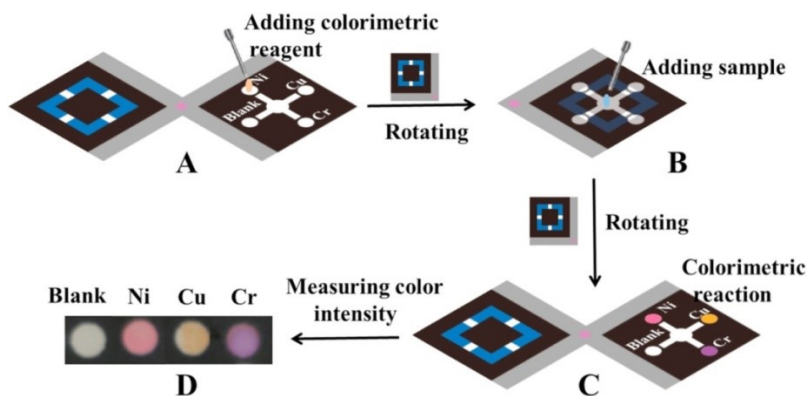

**Fig. S13** Analytical procedure for the multiplexed colorimetric detection of heavy metals on the rotational paper-based device; (A) Dropping the colorimetric reagent and detection reagent into each detection zone as rotational valves were closed, (B) rotating the auxiliary layer to open valves, and adding the sample solution to the sample reservoir, (C) rotating the auxiliary layer to disconnect the detection zones with the sample reservoir, and allowing colorimetric reaction for ten minutes, (D) colorimetric detection of Ni(II), Cu(II) and Cr(VI).<sup>139</sup>

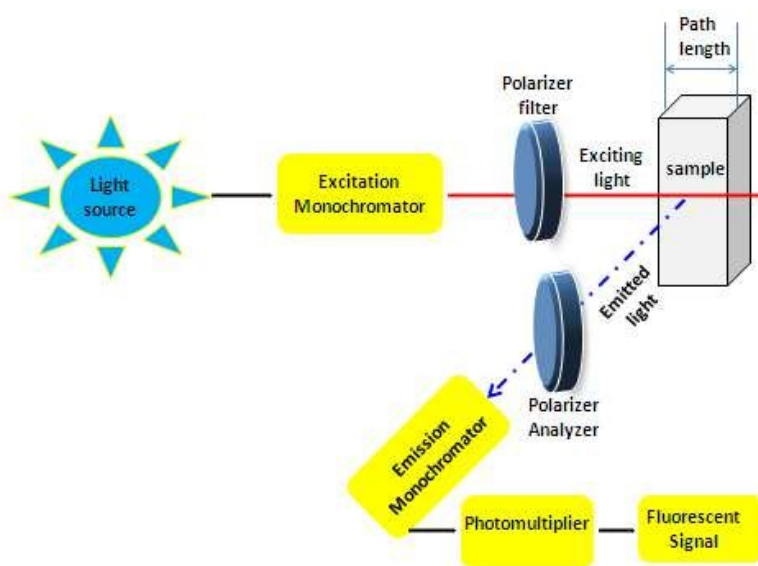

**Fig. S14** Schematic representation of a fluorescence spectrophotometer.<sup>140</sup>



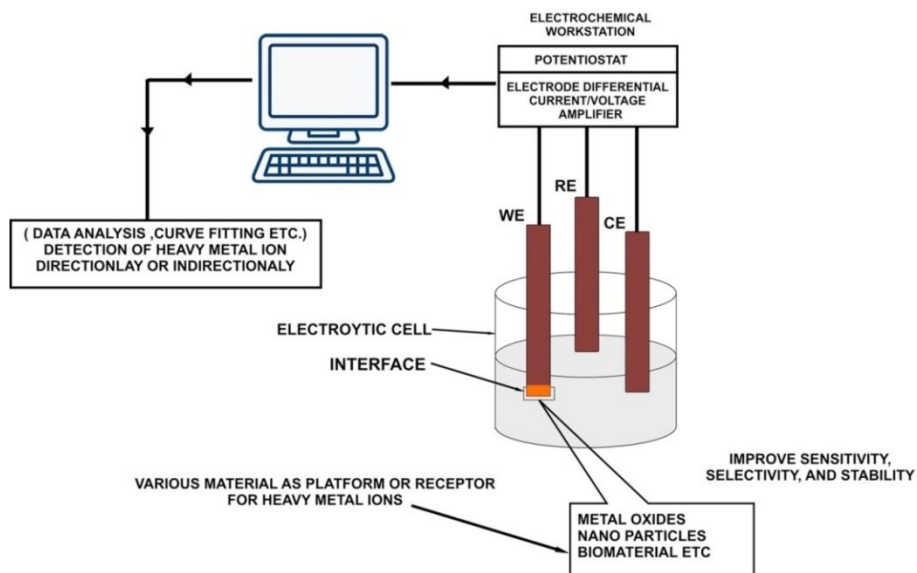

**Fig. S15** General setup for electrochemical detection of heavy metal ions.<sup>145</sup>

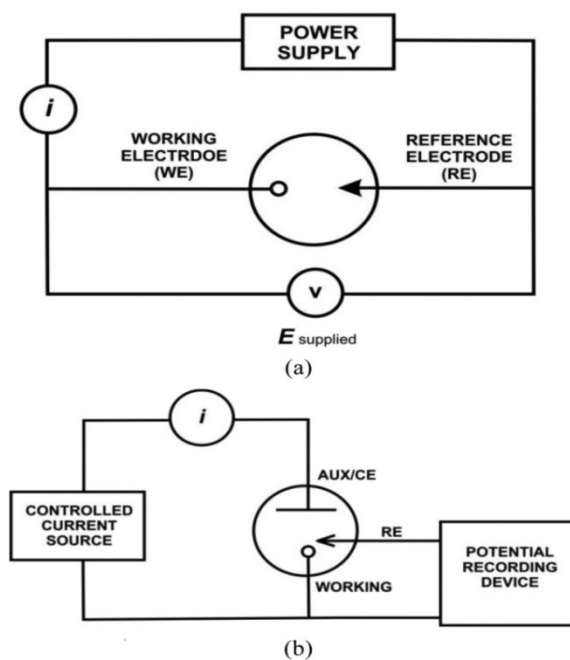

**Fig. S16** (a) Two electrode cell setup and (b) three electrode cell setup.<sup>148</sup>

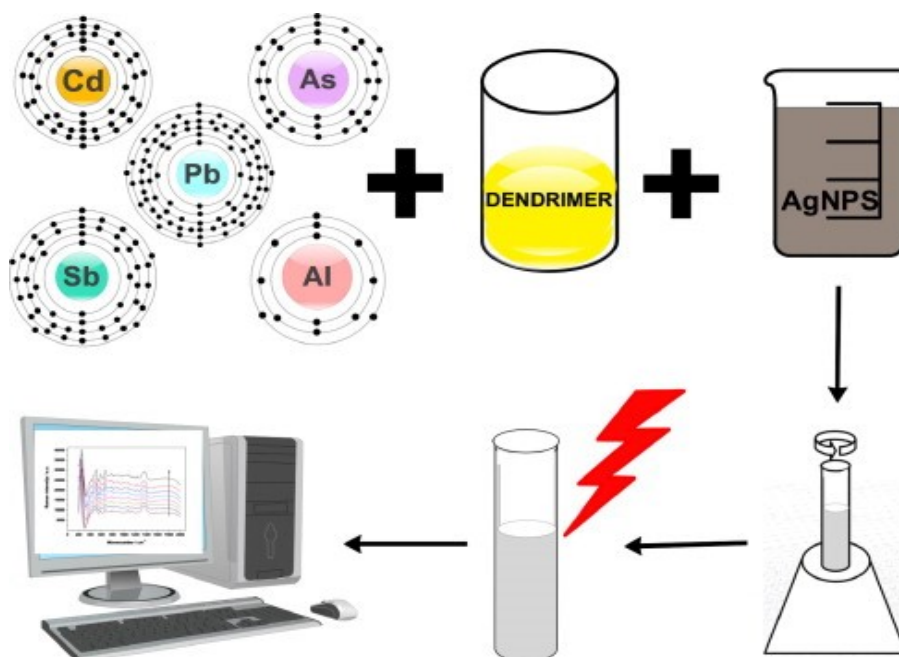

**Fig. S17** Schematic illustration of experimental design.<sup>149</sup>

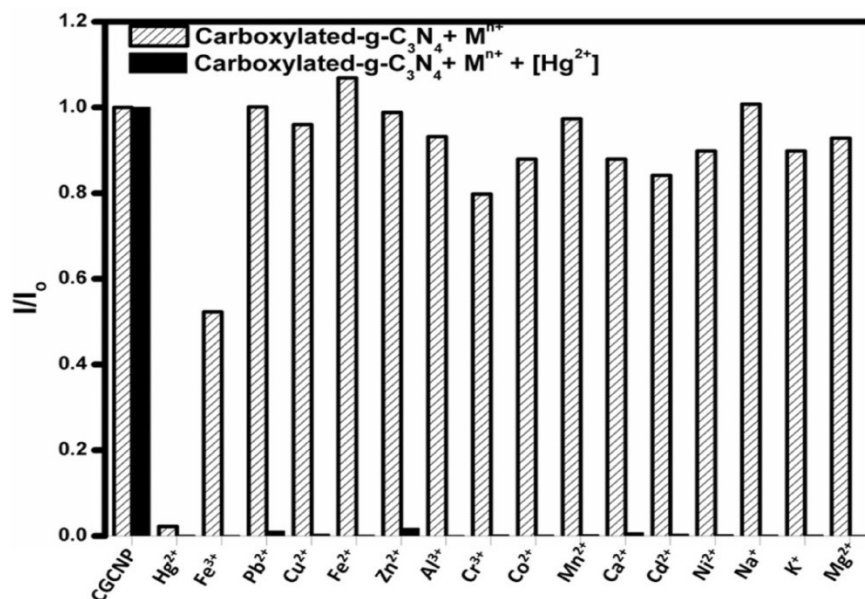

**Fig. S18** Selective relative PL intensities of carboxylated-g-C<sub>3</sub>N<sub>4</sub> (0.03 g L<sup>-1</sup>) after treatment with 50 μM metal ion solutions (white bar), and interference of 50 μM of other metal ions with 15 μM Hg<sup>2+</sup> (black bar), λ<sub>ex</sub> = 250 nm.<sup>160</sup>

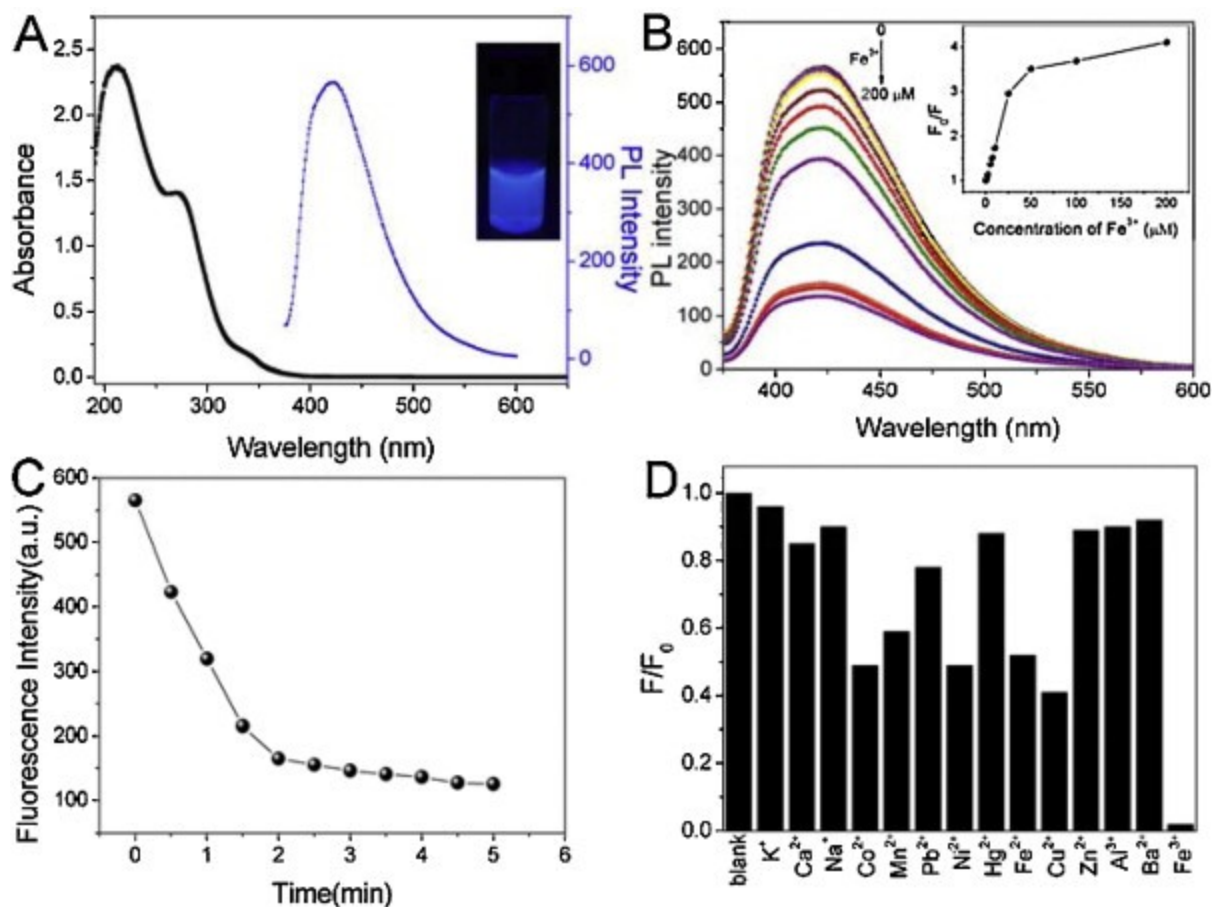

**Fig. S19** (A) UV–vis absorption (black line) and PL emission (blue line) spectra of the g-C<sub>3</sub>N<sub>4</sub> nanofibers thus obtained. Inset: the photograph of g-C<sub>3</sub>N<sub>4</sub> nanofibers suspension under UV light (365 nm). (B) PL spectra of g-C<sub>3</sub>N<sub>4</sub> nanofibers dispersion in the presence of different Fe<sup>3+</sup> concentrations (from top to bottom: 0, 0.05, 0.1, 0.2, 0.5, 1, 2, 5, 7, 10, 25, 50, 100 and 200 μM). Inset: The dependent of F<sub>0</sub>/F on the concentrations of Fe<sup>3+</sup> ions within the range of 0–200 μM (excitation at 365 nm; F<sub>0</sub> and F are g-C<sub>3</sub>N<sub>4</sub>nanofibers fluorescence intensities at 425 nm in the absence and presence of Fe<sup>3+</sup> ions, respectively). (C) Fluorescence quenching of g-C<sub>3</sub>N<sub>4</sub> nanofibers by 200 μM Fe<sup>3+</sup> in tris-HCl buffer (pH 7.4) as a function of time (λ<sub>ex</sub> = 365 nm). (D) Selective PL response of g-C<sub>3</sub>N<sub>4</sub> nanofibers after treatment with 1.0 mM metal ion solutions.<sup>203</sup>

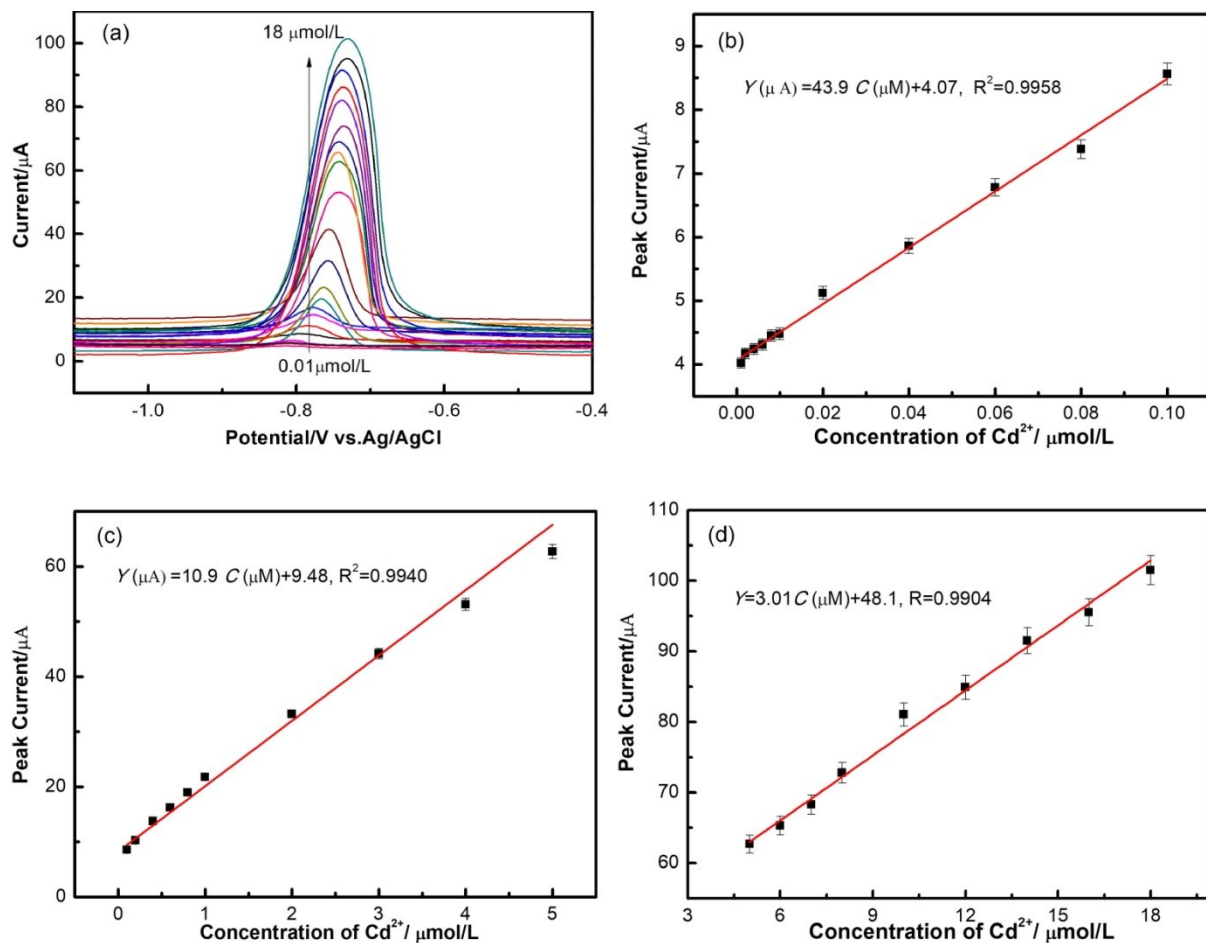

**Fig. S20** (a) SWASV curves on NSCN-GC electrode in a 0.1 M HAc-NaAc buffer solution at concentrations ranging from 0.001 μM to 18 μM of Cd<sup>2+</sup>, and the fitting curves of the stripping peak areas versus the concentration range of 0.001–0.1 μM (b), 0.1–5 μM (c) and 5–18 μM (d).<sup>241</sup>

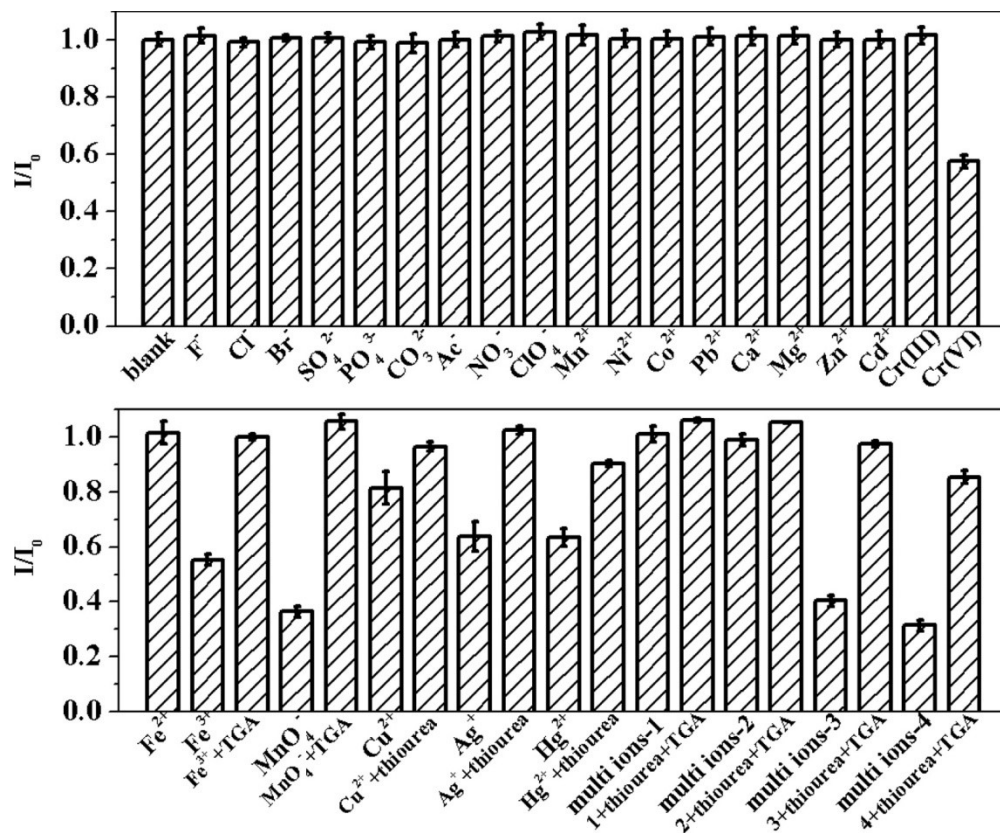

**Fig. S21** Fluorescence responses of the g-C<sub>3</sub>N<sub>4</sub> nanosheets in the presence of 200  $\mu$ M solution of various ion, The blank represents the fluorescence responses of the solution of g-C<sub>3</sub>N<sub>4</sub> nanosheets without any ion, The multi-ions-1 contains Ca<sup>2+</sup>, Mg<sup>2+</sup>, K<sup>+</sup>, Na<sup>+</sup>; multi-ions-2 contains F<sup>-</sup>, Cl<sup>-</sup>, Br<sup>-</sup>, SO<sub>4</sub><sup>2-</sup>, PO<sub>4</sub><sup>3-</sup>, CO<sub>3</sub><sup>2-</sup>, Ac<sup>-</sup>, NO<sub>3</sub><sup>-</sup>; multi-ions-3 contains Mn<sup>2+</sup>, Cu<sup>2+</sup>, Ni<sup>2+</sup>, Fe<sup>3+</sup>, Zn<sup>2+</sup>, Co<sup>2+</sup>; multi-ions-4 contains Cu<sup>2+</sup>, Fe<sup>2+</sup>, Fe<sup>3+</sup>, Hg<sup>2+</sup>, the concentration of each ion in the multi-ions groups was 200  $\mu$ M.<sup>247</sup>

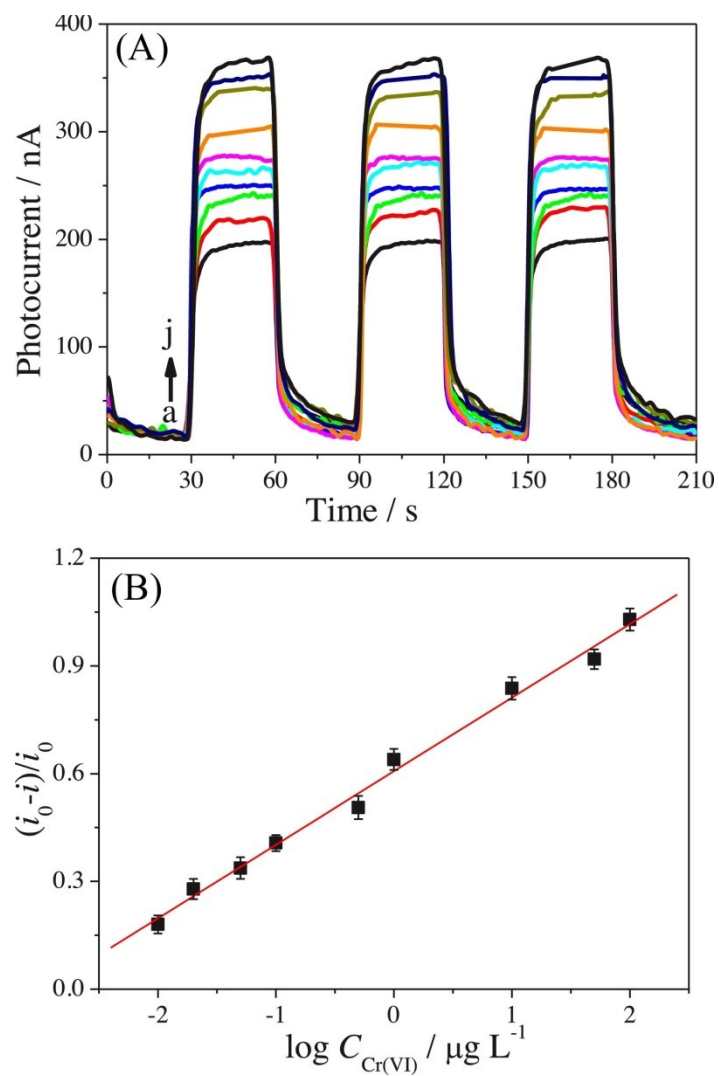

**Fig. S22** (A) Photocurrent responses of IIP@F-g-C<sub>3</sub>N<sub>4</sub>/FTO toward Cr(VI) at increasing concentrations (from bottom to top, 0, 0.01, 0.05, 0.1, 0.5, 1.0, 10, 50 and 100  $\mu\text{g L}^{-1}$ ) in a supporting electrolyte of 0.1 M pH 6.0 tris-HCl, (B) Linear calibration curve.<sup>249</sup>

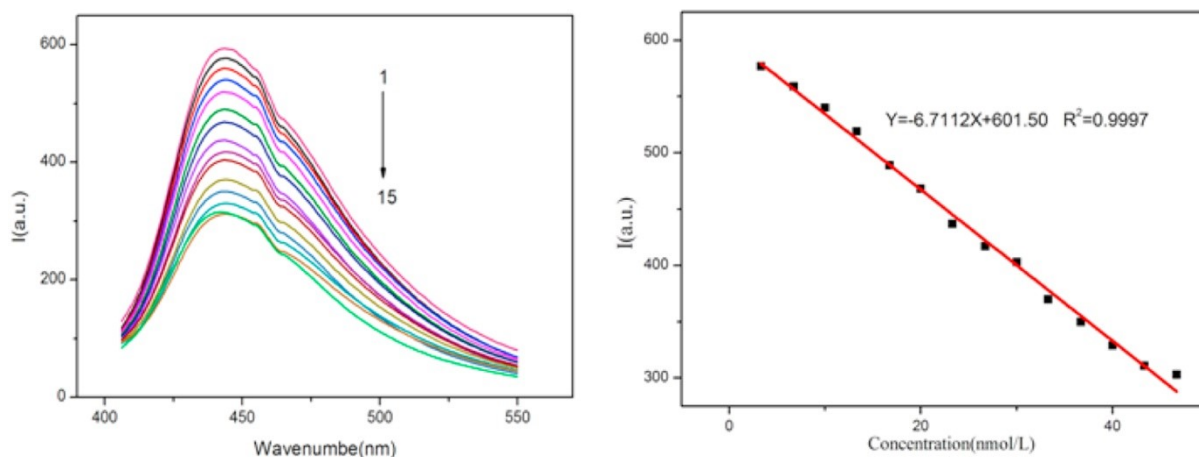

**Fig. S23** Emission spectra of  $\text{Ag}^+$  (0, 3.3., 6.7, 10, 13.3, 16.7, 20, 23.3, 26.7, 30, 33.3, 36.7, 40, 43.3, and 46.7 nM) with excitation at 310 nm (left) and the linearity of peak intensity with respect to  $\text{Ag}^+$  concentrations (right).<sup>265</sup>

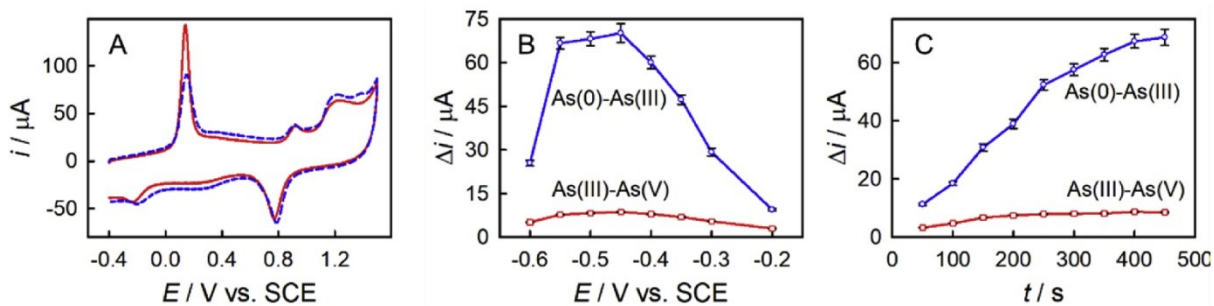

**Fig. S24** (A) Cyclic voltammograms on AuNPs/GCE (dashed curve), AuNPs/g- $\text{C}_3\text{N}_4$ /GCE (solid curve) in 0.5 M aqueous  $\text{H}_2\text{SO}_4$  containing 2.00  $\mu\text{M}$  As(III) at  $1 \text{ V s}^{-1}$ .  $E_{\text{cp}}$ : 0.4 V;  $t_{\text{cp}}$ : 400 s, (B) Effect of  $E_{\text{cp}}$  and (C) effect of  $t_{\text{cp}}$  on LSASV ( $1 \text{ V s}^{-1}$ ) peak currents of 1.00  $\mu\text{M}$  As(III) in 0.5 M aqueous  $\text{H}_2\text{SO}_4$  at AuNPs/g- $\text{C}_3\text{N}_4$ /GCE, The LSASV experiments were conducted after preconcentration at -0.45 V for 400 s, except for the examined parameter.<sup>281</sup>
